# Supplementary material for: Moisture-induced autonomous surface potential oscillations for energy harvesting
Source: Research Square preprint supplement (doi:10.21203/rs.3.rs-138662/v1), 2021-01-14
Supplement: Supplementary file 1 [file dc1a0e014377711179e62a96.docx]

Supplementary Materials For

**Moisture-induced autonomous surface potential oscillations for energy harvesting**

Yu Long1, Peisheng He1, Zhichun Shao1, Han Kim3, Mingze Yao4, Yande Peng1, Renxiao Xu1, Seung-Wuk Lee3, Junwen Zhong2* and Liwei Lin1*

1 Department of Mechanical Engineering, University of California Berkeley, Berkeley, California, 94720, USA.

2 Department of Electromechanical Engineering and Centre for Artificial Intelligence and Robotics, University of Macau, Macao, 999078, China

3 Department of Bioengineering, University of California Berkeley, Berkeley, California, 94720, USA

4 Department of Engineering Mechanics, Tsinghua University, Beijing, 100084, China

[junwenzhong@um.edu.mo](mailto:junwenzhong@um.edu.mo)

lwlin@berkeley.edu

**Supplementary Figures**

**Fig. S1.** (a) P(MEDSAH-co-AA) polymer synthesis reaction; (b) The photograph of the as-synthesized polymer with a “University of California, Berkeley” logo beneath.

**Fig. S2.** N-K EDX results of P(MEDSAH-co-AA) polymers with different compositions: (a) MEDSAH/AA=1/2; (b) MEDSAH/AA=1/3; (c) MEDSAH/AA=1/4.

**Fig. S3.** ATR-FT-IR results of dry and wet P(MEDSAH-co-AA polymers with different compositions: (a) MEDSAH/AA=1/2; (b) MEDSAH/AA=1/3; (c) MEDSAH/AA=1/4.

**Fig. S4.** Summary of the proposed “proton oscillation” mechanism in loops.

**Fig. S5.** Water content of P(MEDSAH-co-AA) polymer during (a) hydration and (b) dehydration process.

**Fig. S6.** The cross-sectional view of the energy harvester device.

**Fig. S7.** Comparison of the signal period from outputs of moisture-enabled energy harvester and noise.

**Fig. S8.** Current oscillation performance under continuous moisture feeding (without dehydration process).

**Fig. S9.** Output current density of energy harvesters with different polymer compositions: (a) MEDSAH/AA=1/2; (b) MEDSAH/AA=1/3; (c) MEDSAH/AA=1/4.

**Fig. S10.** (a) The circuit used in charging the capacitance for measuring the output voltage; (b) Voltage curves of energy harvesters with different polymer compositions (“reference” refers to the outside noise); (c) Voltage curves of energy harvester (MEDSAH/AA=1/4) under different working temperature.

**Fig. S11.** Protonoscillation simulation results of polymers with different compositions: (a) MEDSAH/AA=1/2; (2) MEDSAH/AA=1/3; (3) MEDSAH/AA=1/4.

**Fig. S12.** Output current signal of the energy harvester (MEDSAH/AA=1/2) under (a) 12 oC and (b) 60 oC.

**Fig. S13.** Protonoscillation simulation results of polymer (MEDSAH/AA=1/2) under (a) 12 oC and (b) 60 oC.

**Supporting Explanation 1:** Analogy to Ca2+ oscillation:

| Ca2+ oscillation | This work | Similarity |
| --- | --- | --- |
| IP3 | H2O | Start the oscillation |
| Ca2+ | H+ | Oscillated signal |
| 1st pool | -COOH | In positive feedback(s) |
| 2nd pool | -SO3- | In negative feedback(s) |

**Supporting Explanation 2:** Kinetic Simulation method:

Kinetic analysis of the chemical reactions is performed. To simplify the system, we assume that there are only 5 possible reactions in the system:

The reaction rate of the above reactions can be expressed as follows, assuming that and are first-order reactions,, and are second-order reactions.

Therefore, the concentration of each species versus time can be expressed as follows:

The concentration of , and can be derived using the conservation law of matters:

The concentration of water, , is controlled by vin and vout, where vout is assumed to be a constant, vin can be expressed as:

where is the concentration of hydrogen cation, represents the initial concentration of hydrogen cation. Therefore, the concentration of water versus time can be expressed as the following differential equation:

As the concentration of water affects the breaking of ionization bonds, a factor is introduced in the reaction rate constant of r2 when the concentration of water, [H2O], is lower than the threshold value :

To numerically solve the differential equations (1)-(5), the explicit 1st-upwind scheme is adopted:

In the calculation, we set the rate constant , , , , , timestep , , . and are varied according to different proportion with their total mass is a constant which is set as 150105.

The initial concentration of H+, has positive correlation with .

Other initial concentration is set as follows:

With , , , , , the oscillation period can be decreased to 57s. With , , , , , the oscillation period can be increased to 97s. These two represents the influence of temperature change.

The calculation script is written in python3. The data are normalized by the initial proton concentration. As it is described above, the water concentration, which represents humidity in experiment, has positive relationship with the initial proton concentration. Therefore, the simulation about different polymer composition can also represent the influence on outside humidity thermodynamically.
